# Supplementary material for: Exclusive destruction of mitotic spindles in human cancer cells
Source: PubMed Central journal article supplement (PMC5400547; doi:10.18632/oncotarget.15343), 2017-02-15
Supplement: oncotarget-08-20813-s001.pdf [file oncotarget-08-20813-s001.pdf]

## Exclusive destruction of mitotic spindles in human cancer cells

### Supplementary Materials

MDA-MB-231  
PJ34

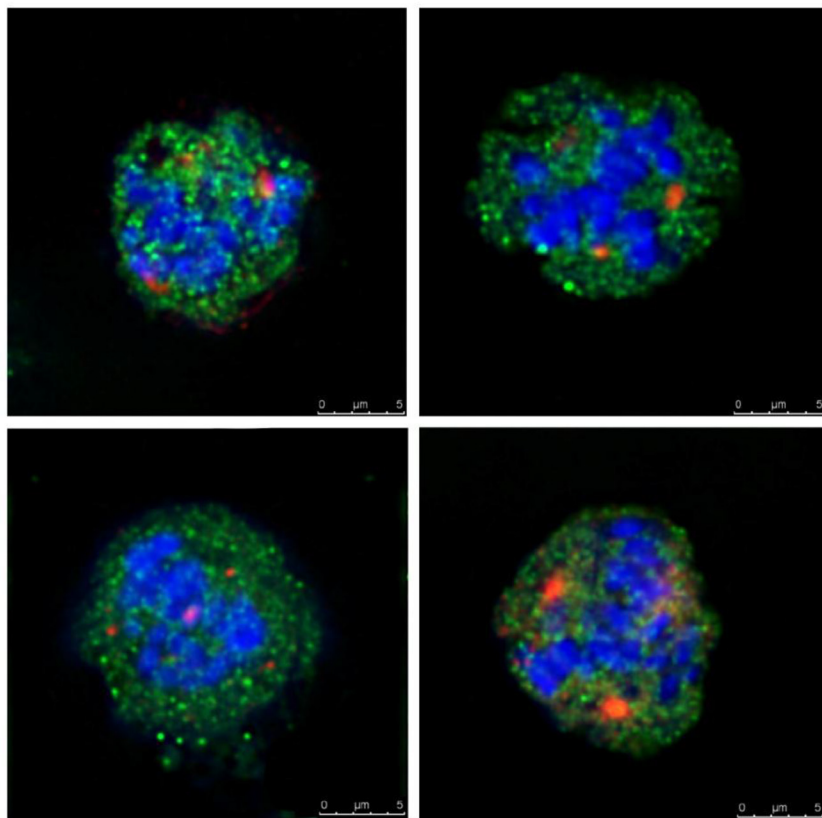

**Supplementary Figure 1: (Supplementary to Figure 3C) Disorganized spindles with scattered misaligned chromosomes and multiple foci of NuMA in MDA-MB-231 cancer cells treated with PJ34 (20  $\mu$ M, 27 h). NuMA (red), kinesin HSET/kifC1 (green), Chromosomes stained with DAPI (blue).**

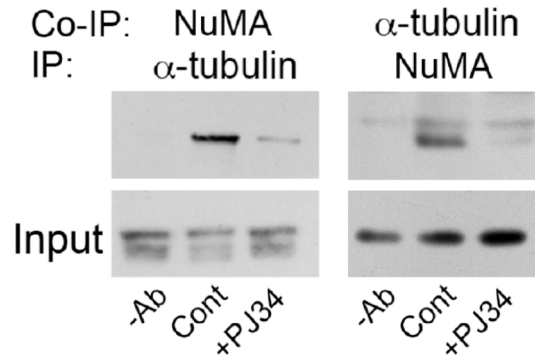

Supplementary Figure 2: (Supplementary to Figure 4A) Co-immunoprecipitation of NuMA by  $\alpha$ -tubulin and of  $\alpha$ -tubulin by NuMA prevented in MDA-MB-231 cells treated with PJ34 (20  $\mu$ M, 27 h).

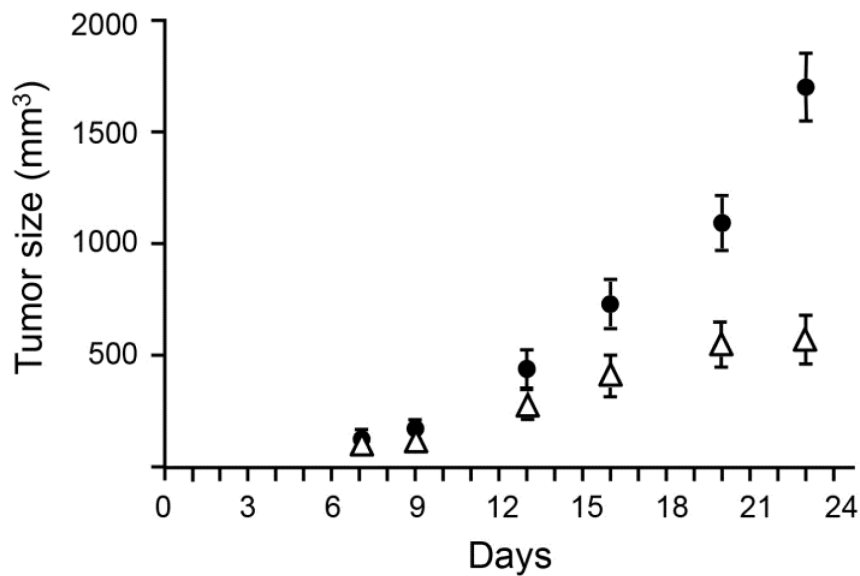

| Untreated  |              | Treated    |              |
|------------|--------------|------------|--------------|
| Tumor size | $\pm \Delta$ | Tumor size | $\pm \Delta$ |
| 1782       | 232.8        | 639        | 92.3         |
| 1090       | 137.7        | 594        | 107.4        |
| 714        | 125          | 460        | 49           |
| 386        | 71.6         | 287        | 16.2         |
| 154        | 22.2         | 140        | 11.          |
| 130        | 11.          | 110        | 9.4          |

Supplementary Figure 3: (Supplementary to Figure 8) Average tumor size developed in athymic mice injected subcutaneously with human triple-negative breast cancer cells MDA-MB-231 ( $5 \times 10^6$  cells/animal, 97% viability tested by trypan blue staining, were injected in ratio 2:1 mix with Matrigel<sup>TM</sup>/PBS mix (1:1 ratio)), without or during treatment with PJ34 (60 mg/kg, intra-peritoneal injection, daily for 14 days).
